# Supplementary material for: Geological and Geomechanical Characterization of Phosphate Mine Waste Rock in View of Their Potential Civil Applications: A Case Study of the Benguerir Mine Site, Morocco
Source: MDPI journal article supplement (doi:10.3390/min13101291), 2023-10-03
Supplement: s1 [file s1]

Case Report

# Geological and Geomechanical Characterization of Phosphate Mine Waste Rock in View of Their Potential Civil Applications: A Case Study of the Benguerir Mine Site, Morocco

Safa Chlahbi <sup>1,2,\*</sup>, Tikou Belem <sup>2</sup>, Abdellatif Elghali <sup>1</sup>, Samia Rochdane <sup>1</sup>, Essaid Zerouali <sup>3</sup>, Omar Inabi <sup>1</sup> and Mostafa Benzaazoua <sup>1,\*</sup>

<sup>1</sup> Geology and Sustainable Mining Institute (GSMI), Mohammed VI Polytechnic University (UM6P), Benguerir 43150, Morocco

<sup>2</sup> Research Institute of Mines and Environment (RIME), Université du Québec en Abitibi-Témiscamingue (UQAT), 445 Boul. de l'Université, Rouyn-Noranda, QC J9X 5E4, Canada

<sup>3</sup> OCP Group, Department of Method, Planning, and Performance Benguerir, 2 Street Al Abtal Hay, B.P. Maârif, Casablanca 5196, Morocco

\* Correspondence: safa.chlahbi@uqat.ca (S.C.); mostafa.benzaazoua@um6p.ma (M.B.)

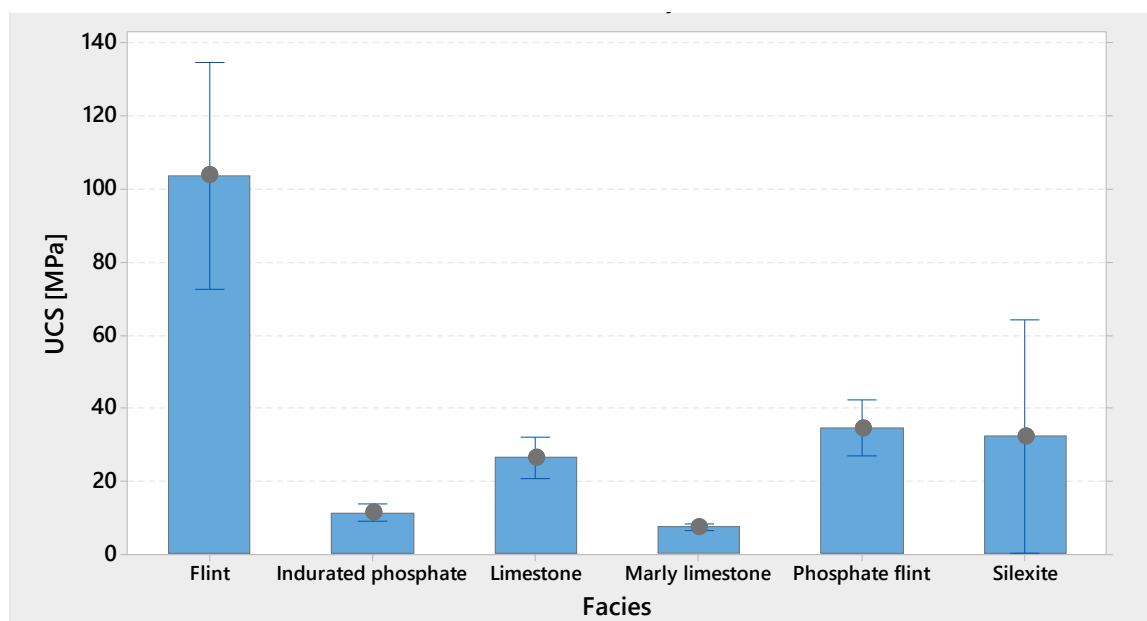

**Figure S1.** The UCS intervals for the six facies.

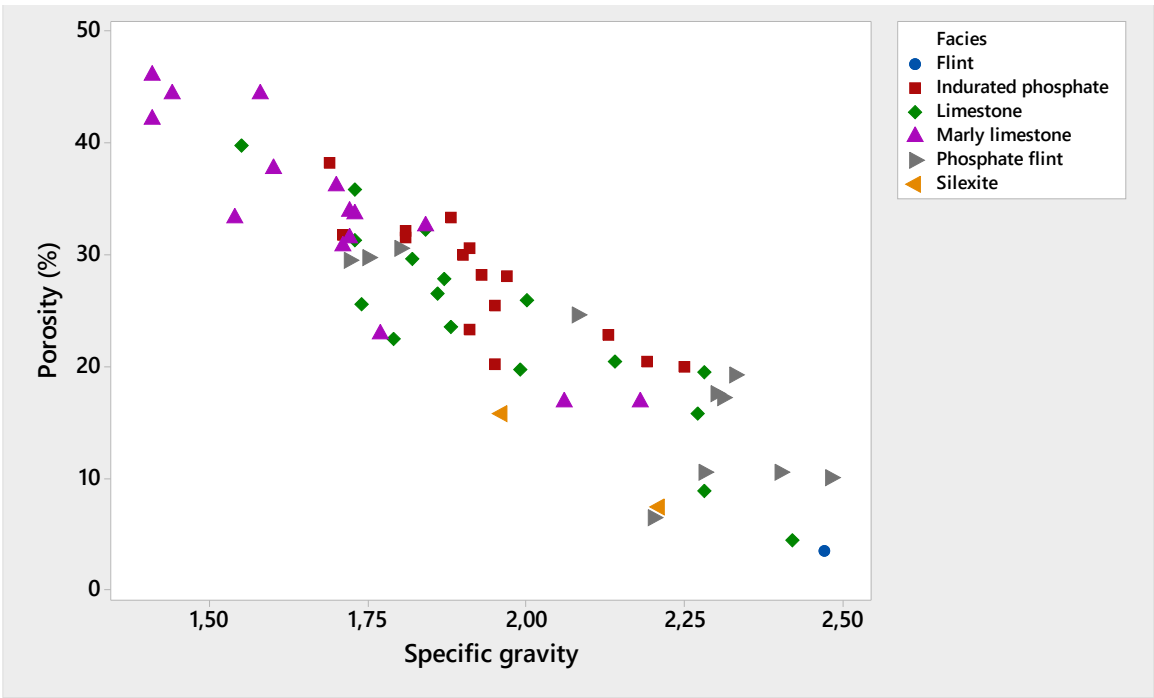

Figure S2. Variation of specific gravity with porosity for the six facies.

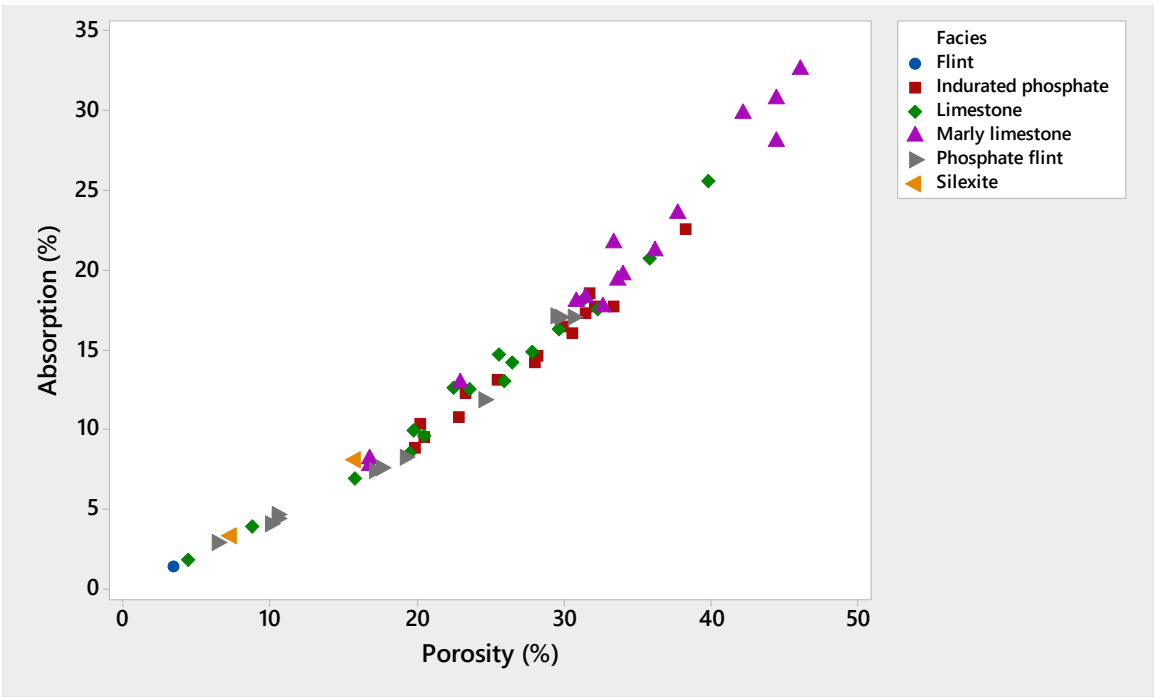

Figure S3. Variation of porosity with absorption for the five facies.
